# Supplementary material for: α-Glucosidase Inhibitors from Vauquelinia corymbosa
Source: PubMed Central journal article supplement (PMC6332183; doi:10.3390/molecules200815330), 2015-08-21
Supplement: molecules-20-15330-s001.pdf [file molecules-20-15330-s001.pdf]

# Supplementary Materials

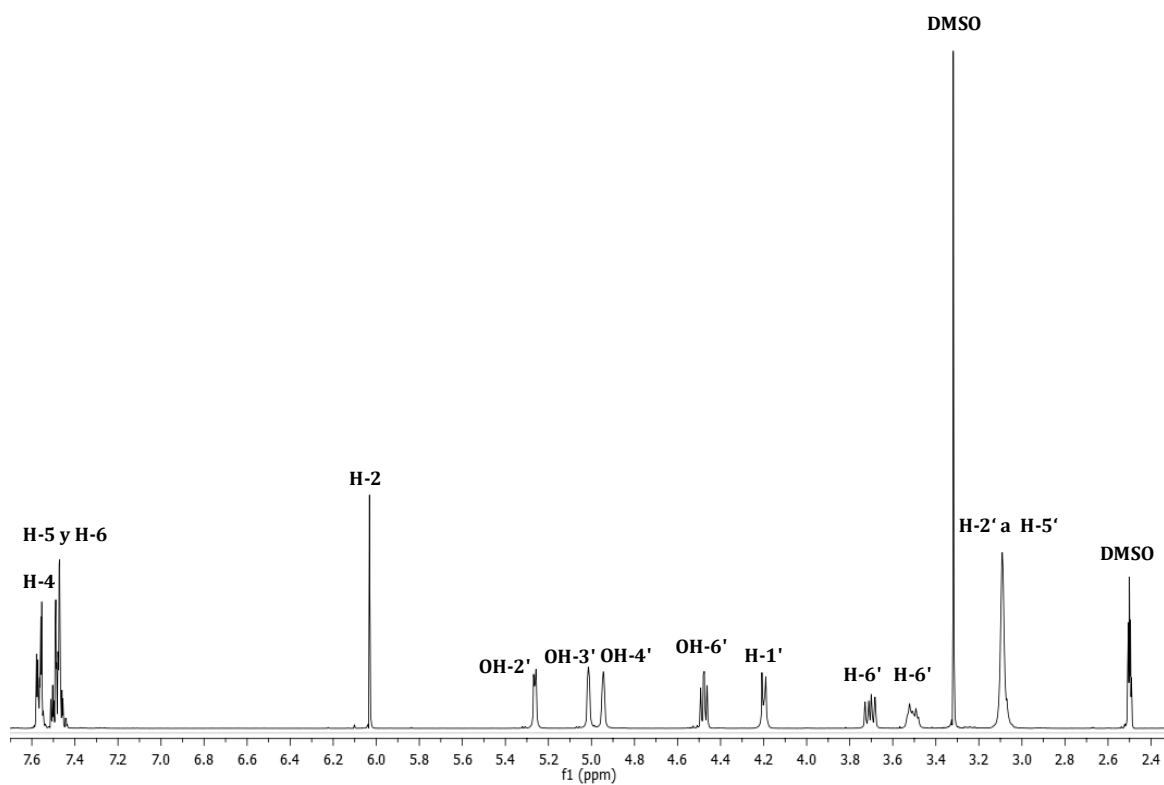

**Figure S1.**  $^1\text{H}$ -NMR spectra of prunasin (**1**) (400 Hz,  $\text{DMSO-}d_6$ ).

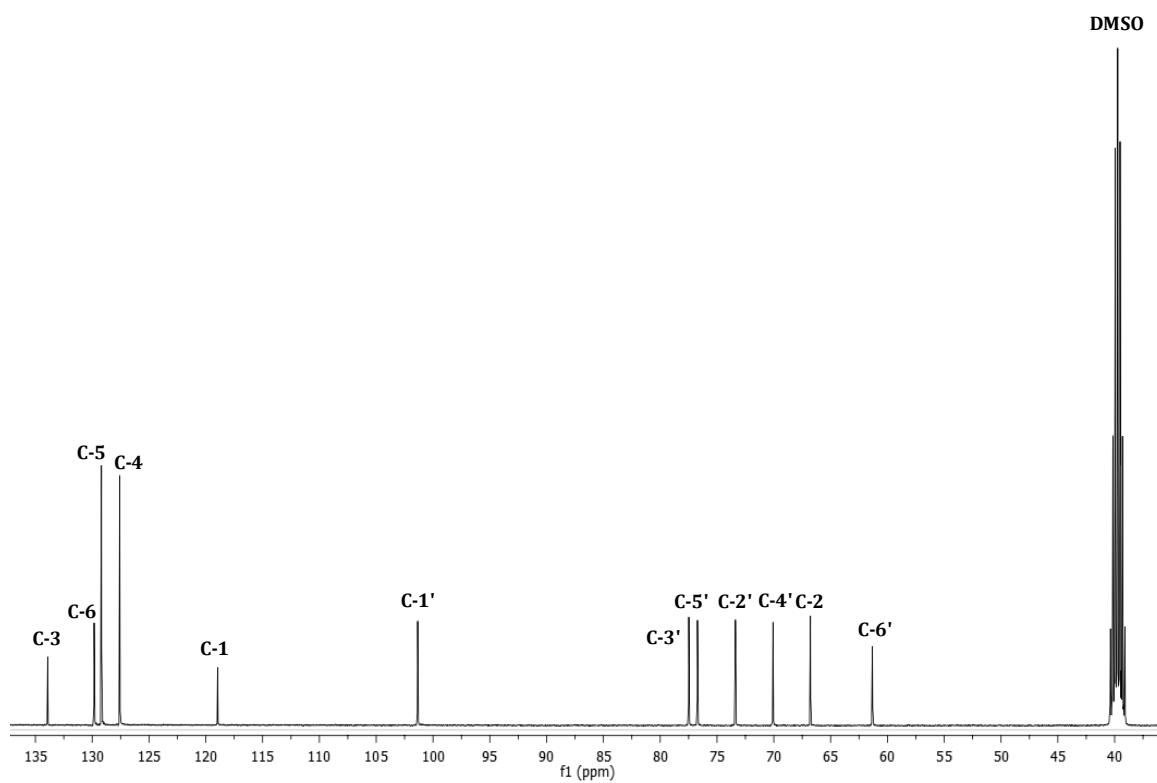

**Figure S2.**  $^{13}\text{C}$ -NMR spectra of prunasin (**1**) (100 Hz,  $\text{DMSO-}d_6$ ).

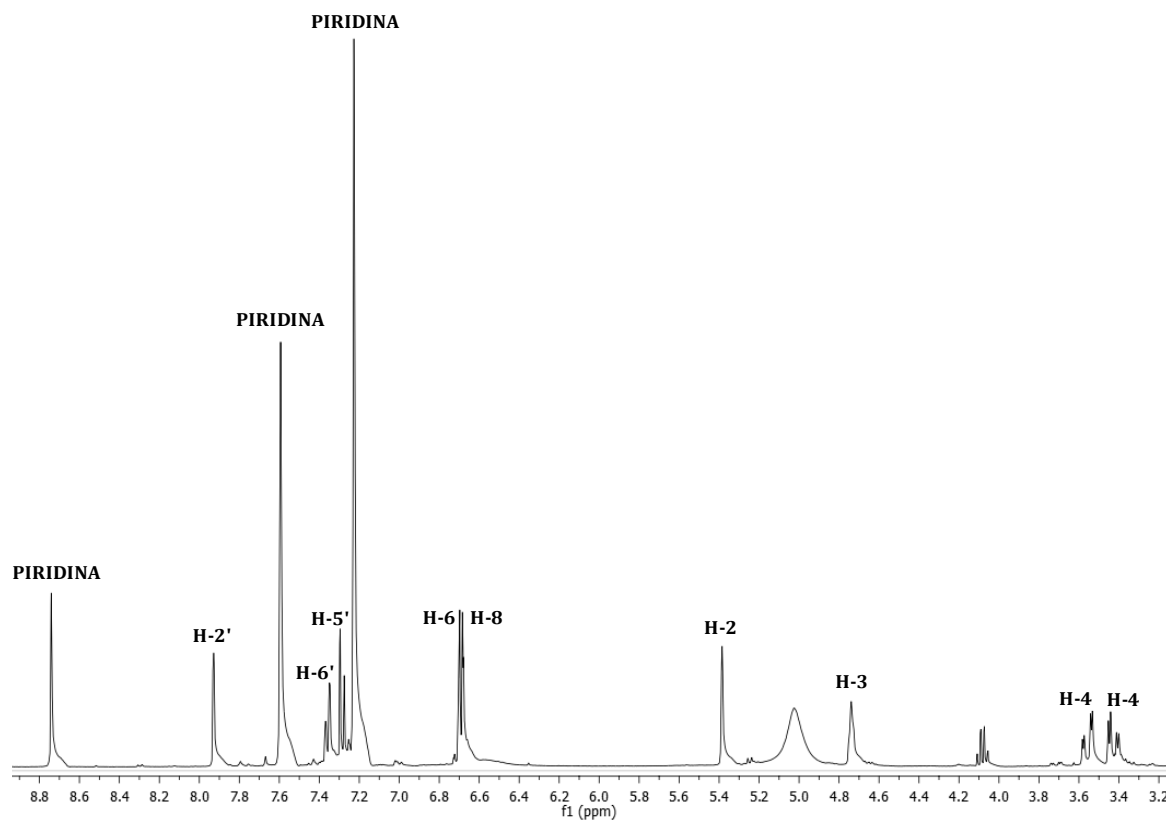

**Figure S3.**  $^1\text{H}$ -NMR spectra of (-)-*epi*-catechin (**2**) (400 Hz,  $\text{DMSO-}d_6$ ).

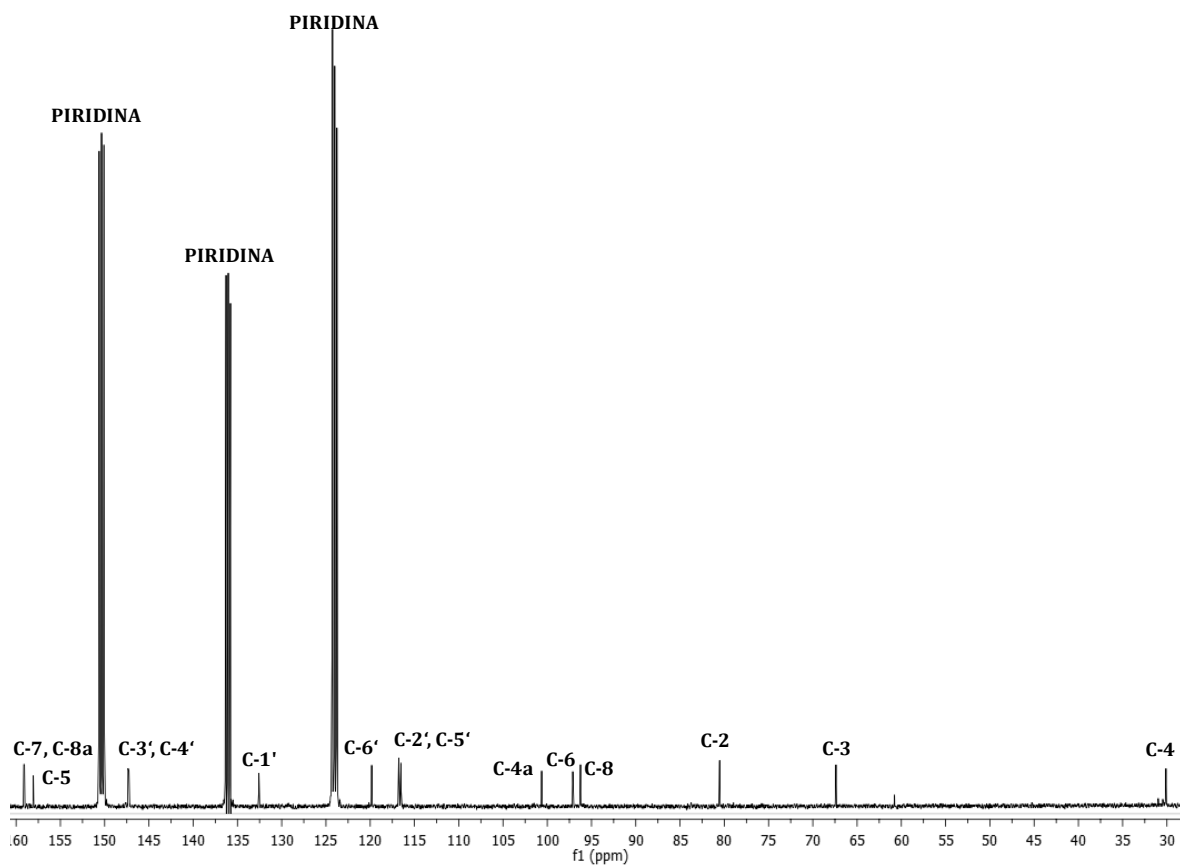

**Figure S4.**  $^{13}\text{C}$ -NMR spectra of (-)-*epi*-catechin (**2**) (100 Hz,  $\text{DMSO-}d_6$ ).

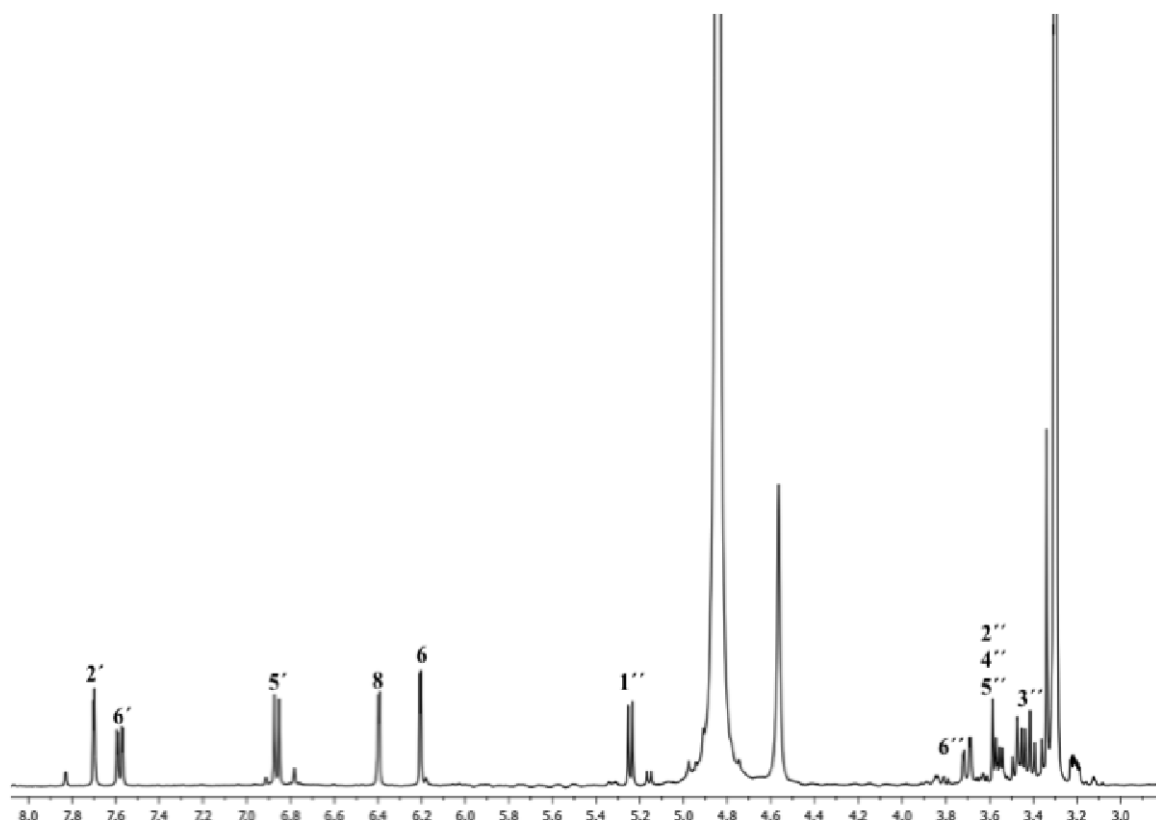

**Figure S5.** <sup>1</sup>H-NMR spectra of isoquercetin (**4**) (400 Hz, DMSO-*d*<sub>6</sub>).

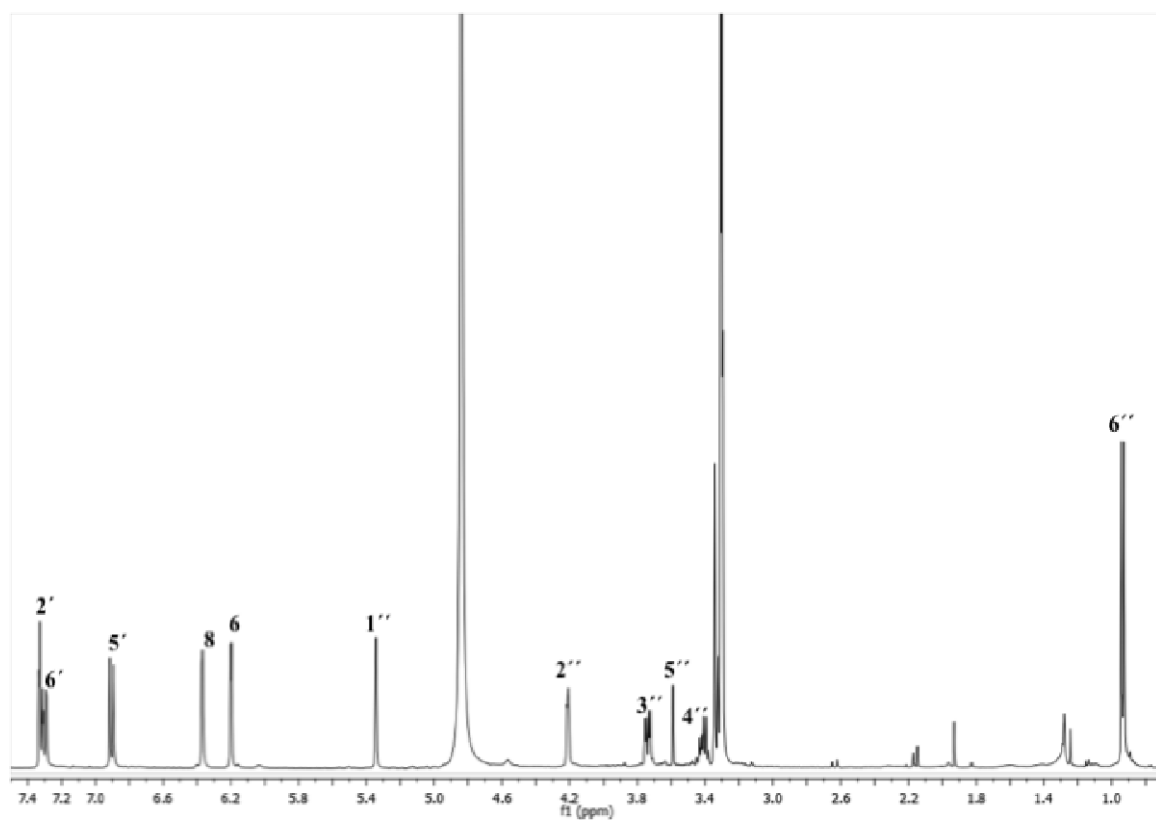

**Figure S6.** <sup>1</sup>H-NMR spectra of quercitrin (**5**) (400 Hz, DMSO-*d*<sub>6</sub>).

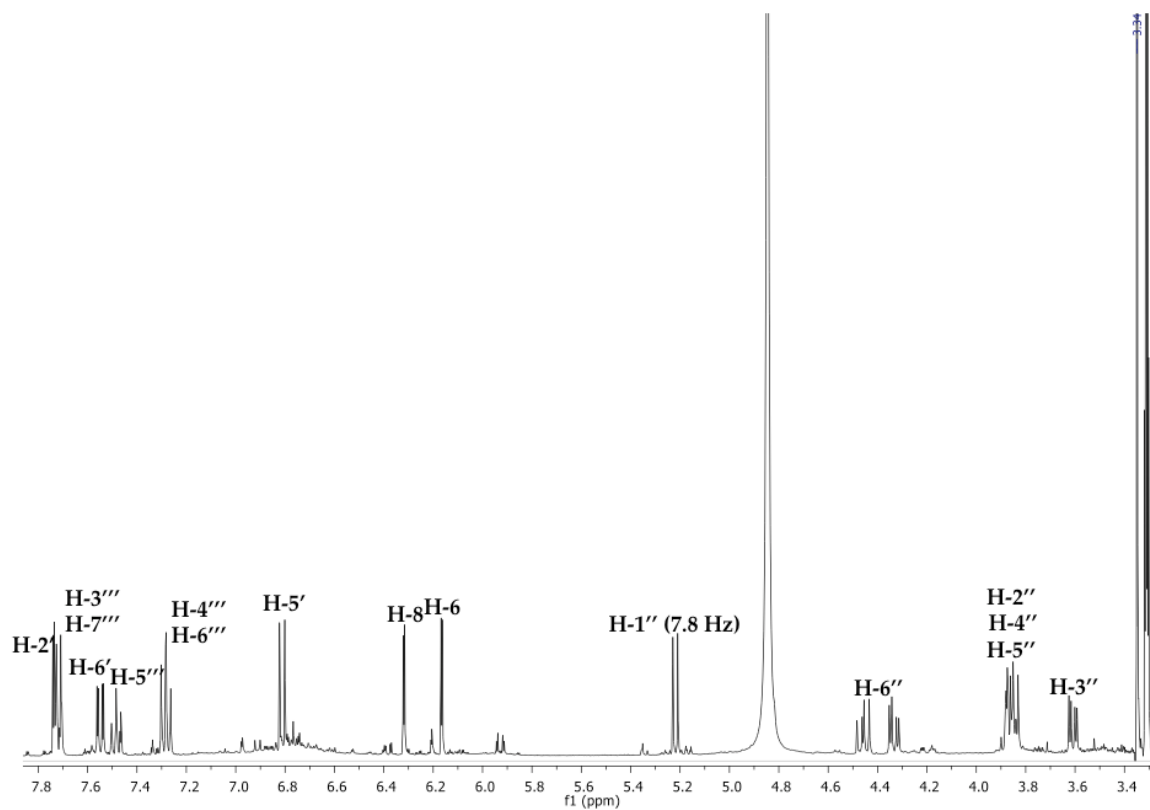

**Figure S7.**  $^1\text{H-NMR}$  spectra of quercetin-3-*O*-(6''-benzoyl)- $\beta$ -galactoside (**6**) (400 Hz,  $\text{CH}_3\text{OH-}d_4$ ).

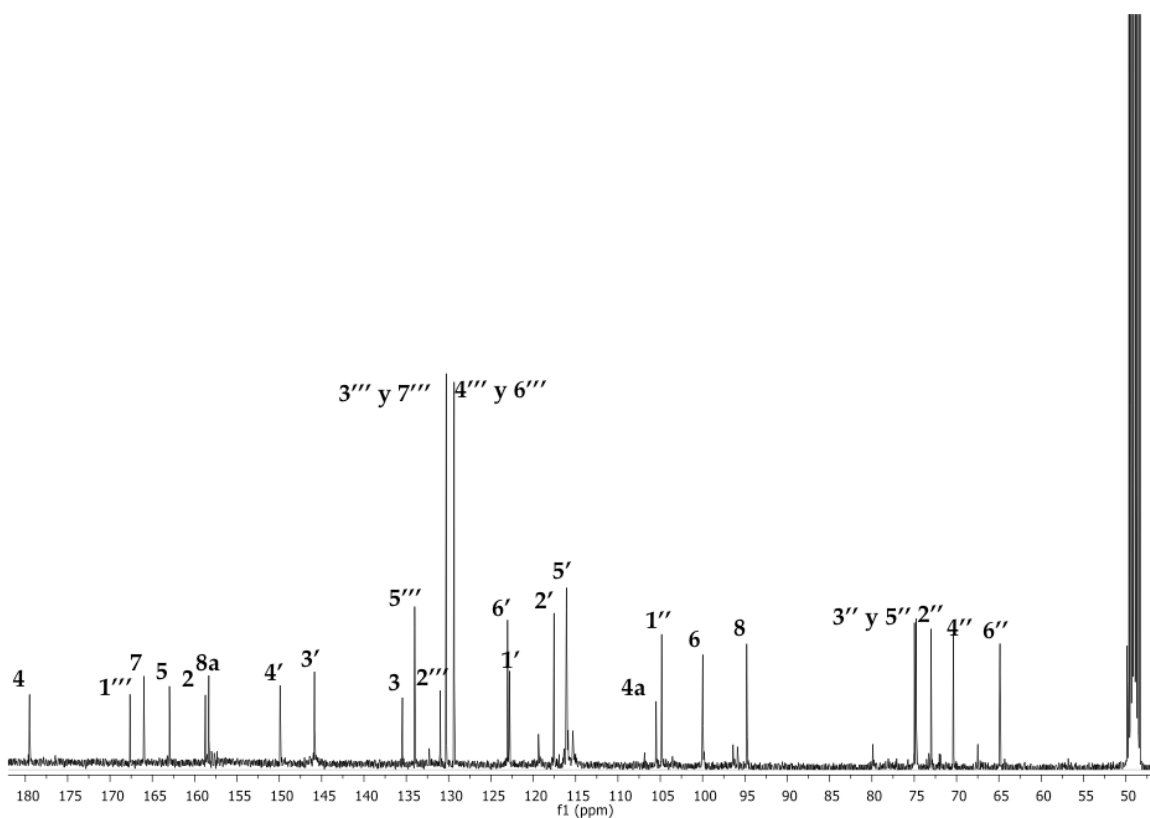

**Figure S8.**  $^{13}\text{C-NMR}$  spectra of quercetin-3-*O*-(6''-benzoyl)- $\beta$ -galactoside (**6**) (100 Hz,  $\text{CH}_3\text{OH-}d_4$ ).

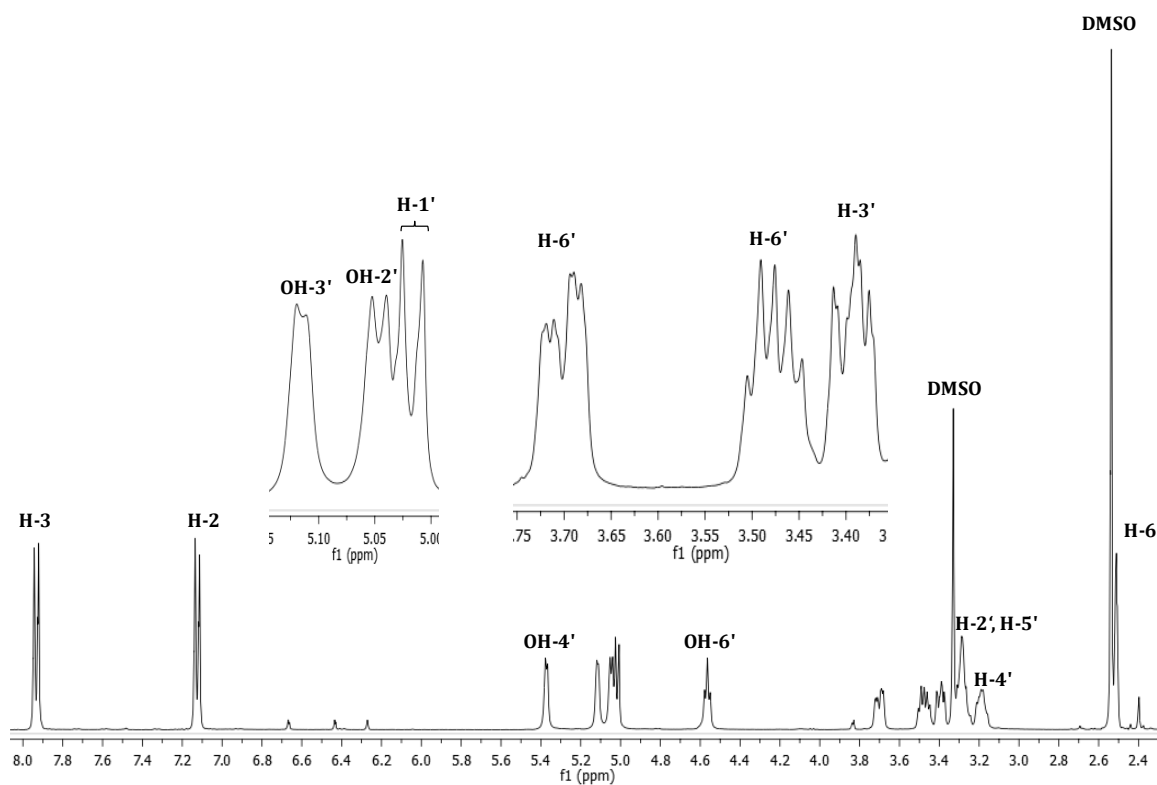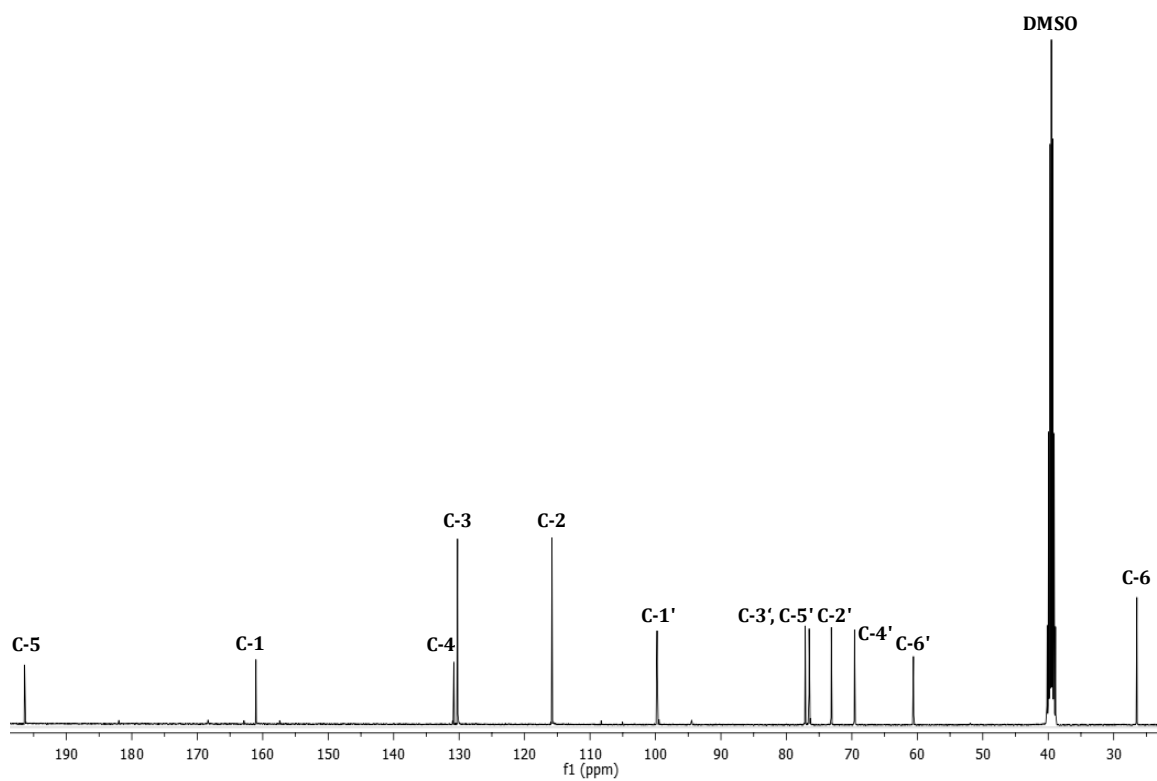

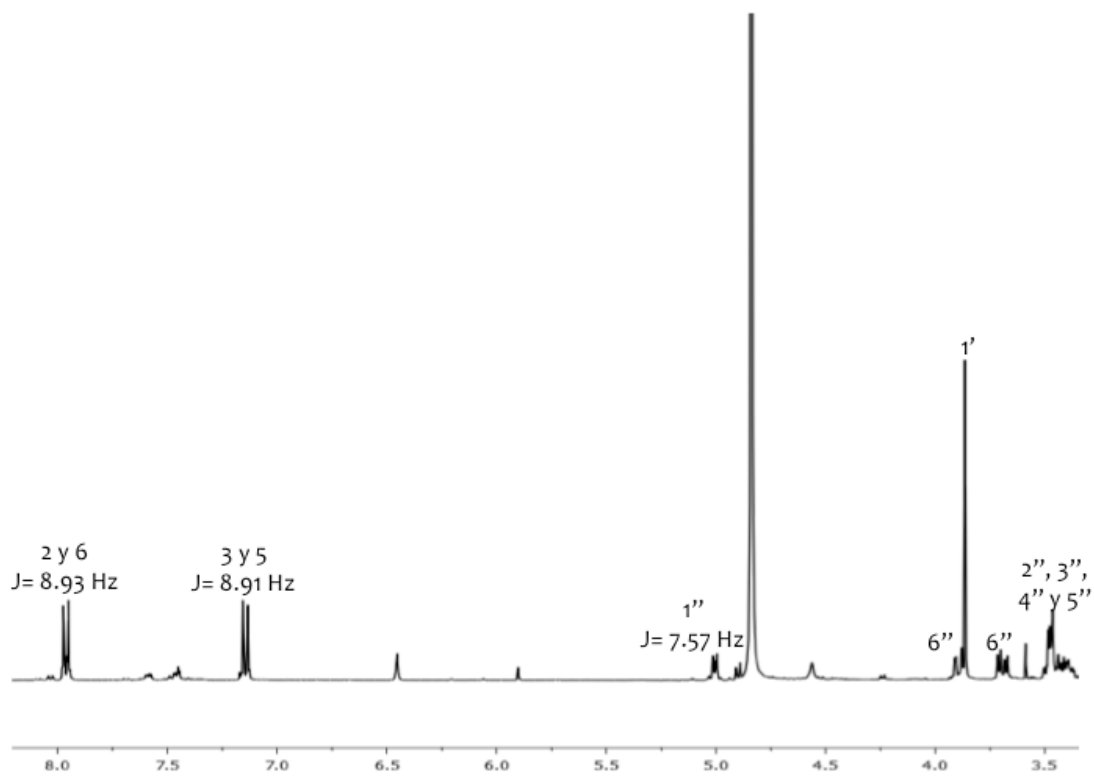

**Figure S11.**  $^1\text{H}$ -NMR spectra of methylarbutin (**8**) (400 Hz,  $\text{CH}_3\text{OH-}d_4$ ).

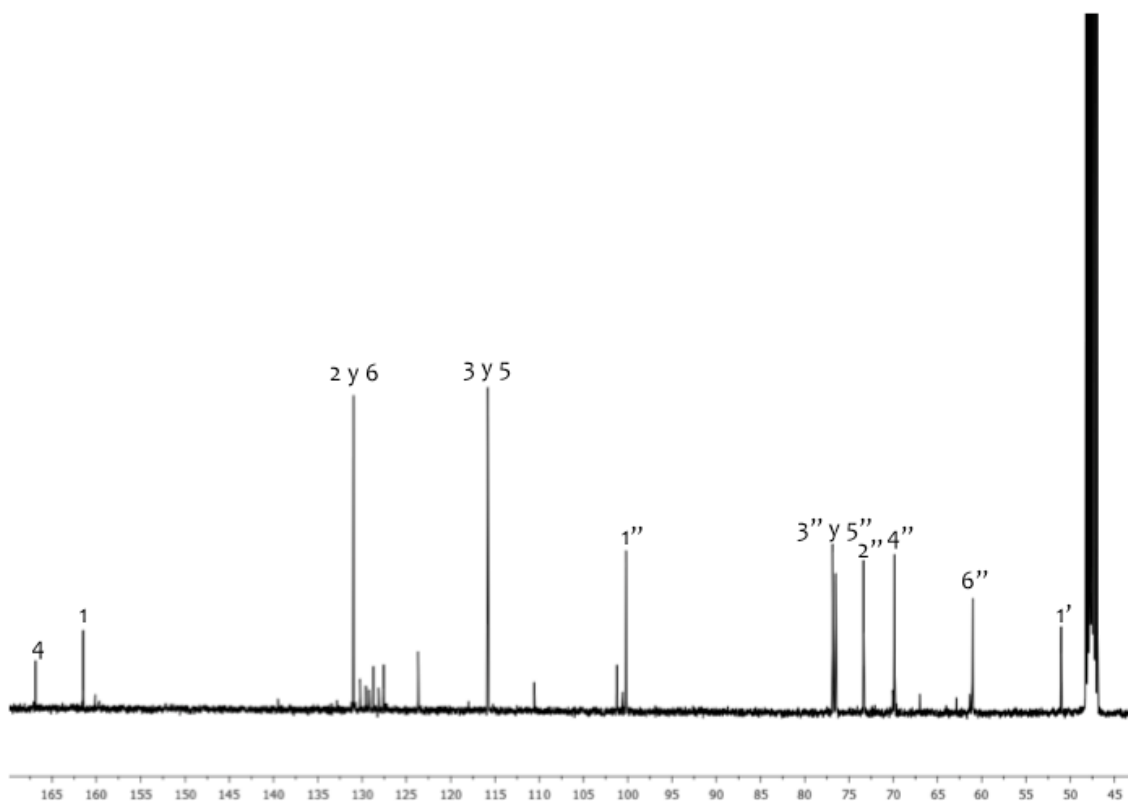

**Figure S12.**  $^{13}\text{C}$ -NMR spectra of methylarbutin (**8**) (100 Hz,  $\text{CH}_3\text{OH-}d_4$ ).

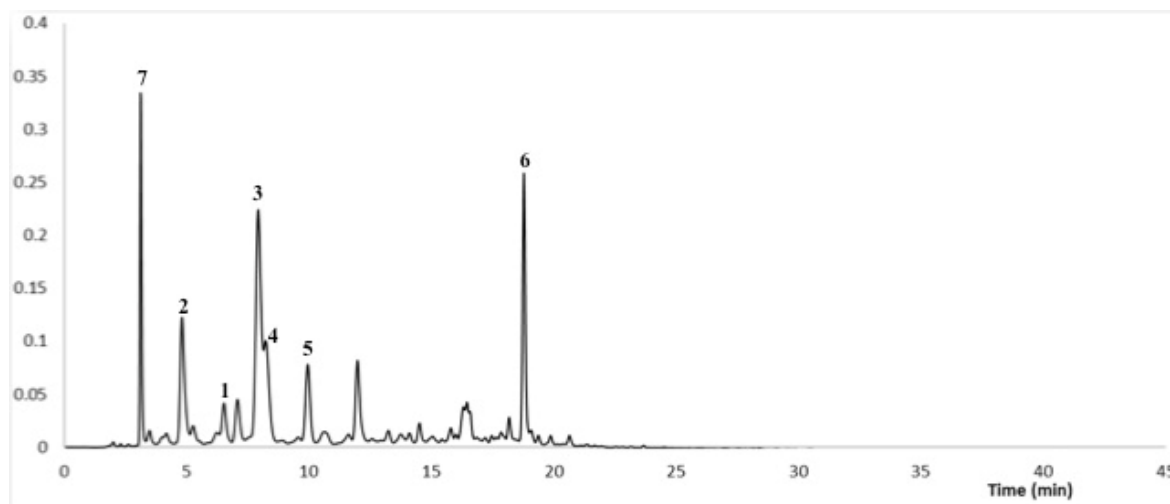

**Figure S13.** Chromatography profile of infusion of *V. corymbosa*. The chromatographic profile of AE was obtained by reverse-phase HPLC; Column: Symmetry C18; Sample: 100  $\mu$ L of AE (1 mg/mL); Detection: 254 nm.

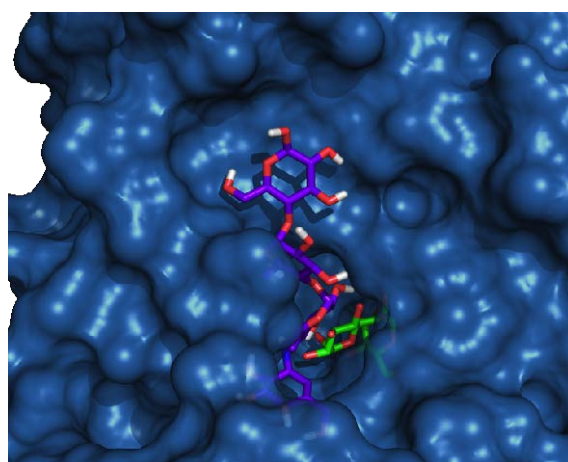

**Figure S14.** Structural model of the complex isomaltase (**green sticks**) with  $\alpha$ -glucosidase and acarbose (**purple sticks**).

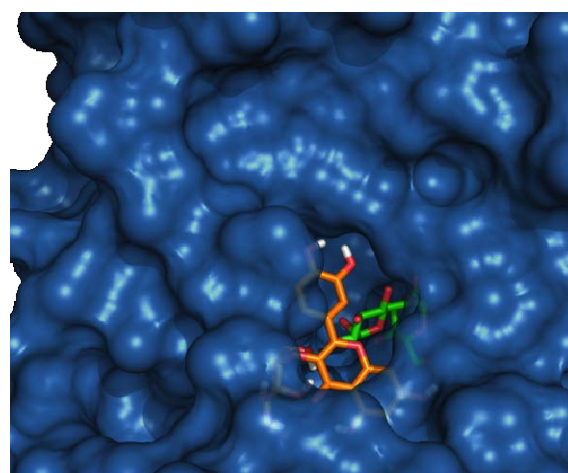

**Figure S15.** Structural model of the complex isomaltase (**green sticks**) with  $\alpha$ -glucosidase and compound 4 (**orange sticks**).

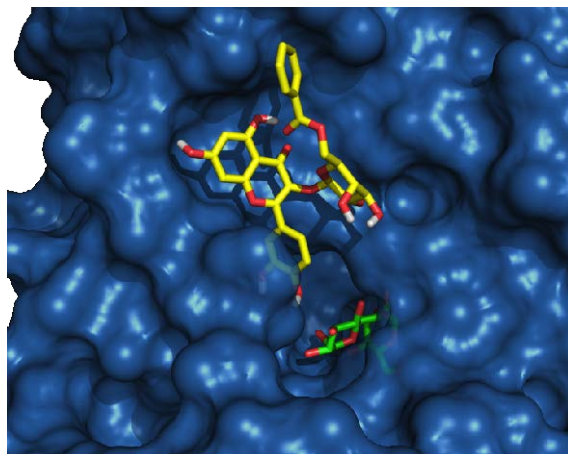

**Figure S16.** Structural model of the complex isomaltase (**green sticks**) with  $\alpha$ -glucosidase and compound **6** (**yellow sticks**).
